# Supplementary material
Source: PubMed Central journal article supplement (PMC8205935)
Supplement: NIHMS1655672-supplement-Supplemental_Data_File___doc___tif__pdf__etc___-_6.pdf [file NIHMS1655672-supplement-Supplemental_Data_File___doc___tif__pdf__etc___-_6.pdf]

| <b>Group</b>      | <b>Timepoint</b> | <b>N</b> | <b>Sedentary Time<br/>(Hours ± SD)</b> | <b>Standing Time<br/>(Hours ± SD)</b> | <b>Stepping Time<br/>(Hours ± SD)</b> |
|-------------------|------------------|----------|----------------------------------------|---------------------------------------|---------------------------------------|
| Control           |                  | 21       | 5.17 ± 3.07                            | 2.15 ± 2.04                           | 1.14 ± 0.91                           |
| Sit-to-stand desk | Baseline         | 23       | 5.03 ± 2.60                            | 1.24 ± 1.77                           | 1.21 ± 0.72                           |
| Treadmill desk    |                  | 22       | 5.15 ± 2.88                            | 1.52 ± 1.93                           | 0.92 ± 0.71                           |
| Control           |                  | 15       | 5.44 ± 3.11                            | 2.52 ± 2.17                           | 1.01 ± 0.81                           |
| Sit-to-stand desk | Month-3          | 21       | 4.38 ± 2.56                            | 2.35 ± 1.96                           | 1.27 ± 0.72                           |
| Treadmill desk    |                  | 22       | 4.45 ± 3.79                            | 2.96 ± 3.03                           | 1.70 ± 0.93                           |
| Control           |                  | 14       | 5.55 ± 4.91                            | 2.31 ± 2.23                           | 1.62 ± 2.44                           |
| Sit-to-stand desk | Month-6          | 20       | 3.93 ± 2.65                            | 1.70 ± 1.90                           | 1.43 ± 0.88                           |
| Treadmill desk    |                  | 19       | 4.38 ± 3.45                            | 2.37 ± 2.46                           | 1.82 ± 1.24                           |
| Control           |                  | 18       | 5.25 ± 3.03                            | 2.37 ± 2.16                           | 1.31 ± 0.94                           |
| Sit-to-stand desk | Month-12         | 20       | 4.57 ± 2.71                            | 2.07 ± 1.88                           | 1.28 ± 0.72                           |
| Treadmill desk    |                  | 20       | 4.46 ± 3.29                            | 3.13 ± 2.43                           | 1.47 ± 0.89                           |

**Supplemental Table 3. Summary of mean daily sedentary, standing and stepping time at the workplace by randomization group\*timepoint, adjusted for age**
