# Supplementary material
Source: PubMed Central journal article supplement (PMC8205935)
Supplement: NIHMS1655672-supplement-Supplemental_Data_File___doc___tif__pdf__etc___-_8.pdf [file NIHMS1655672-supplement-Supplemental_Data_File___doc___tif__pdf__etc___-_8.pdf]

| Comparison                  | Sample Sizes                            |    | Mean Difference ± SD [95% CI] (Hours); Cohen's D Effect Size; p Value; Unidirectional Trend ( ⊗ ) |                                                  |                                                   |                                                   |
|-----------------------------|-----------------------------------------|----|---------------------------------------------------------------------------------------------------|--------------------------------------------------|---------------------------------------------------|---------------------------------------------------|
|                             | N1                                      | N2 | Sedentary Bouts                                                                                   |                                                  | Standing Bouts                                    | Stepping Bouts                                    |
| Between Group Comparisons   | B: Sit-to-stand desk - Control          | 23 | 21                                                                                                | -6.21 ± 15.16 [-15.05, 2.63]; 0.41; 0.1685; ---- | -9.84 ± 30.28 [-27.38, 7.71]; 0.32; 0.2718; ----  | -5.31 ± 16.88 [-15.16, 4.54]; 0.31; 0.2907; ----  |
|                             | B: Treadmill desk - Control             | 22 | 21                                                                                                | -8.92 ± 15.30 [-18.13, 0.29]; 0.58; 0.0576; ---- | -19.25 ± 30.65 [-37.69, -0.82]; 0.63; 0.0407; ⊗   | -11.38 ± 17.05 [-21.59, -1.17]; 0.67; 0.0289; ⊗   |
|                             | B: Treadmill desk - Sit-to-stand desk   | 22 | 23                                                                                                | -2.71 ± 13.25 [-10.50, 5.07]; 0.20; 0.4947; ---- | -9.42 ± 25.07 [-24.11, 5.27]; 0.38; 0.2090; ----  | -6.07 ± 13.76 [-14.10, 1.96]; 0.44; 0.1385; ----  |
|                             | M3: Sit-to-stand desk - Control         | 21 | 15                                                                                                | 0.63 ± 14.40 [-8.84, 10.10]; 0.04; 0.8957; ----  | 6.38 ± 27.84 [-11.86, 24.62]; 0.23; 0.4930; ----  | 7.32 ± 16.17 [-3.35, 17.99]; 0.45; 0.1787; ----   |
|                             | M3: Treadmill desk - Control            | 22 | 15                                                                                                | -7.46 ± 15.31 [-17.49, 2.58]; 0.49; 0.1452; ---- | -11.66 ± 30.53 [-31.53, 8.22]; 0.38; 0.2504; ---- | -3.31 ± 16.92 [-14.40, 7.79]; 0.20; 0.5592; ----  |
|                             | M3: Treadmill desk - Sit-to-stand desk  | 22 | 21                                                                                                | -8.09 ± 14.99 [-17.08, 0.90]; 0.54; 0.0779; ---- | -18.04 ± 29.88 [-35.94, -0.14]; 0.60; 0.0483; ⊗   | -10.62 ± 16.32 [-20.38, -0.87]; 0.65; 0.0328; ⊗   |
|                             | M6: Sit-to-stand desk - Control         | 20 | 14                                                                                                | -4.06 ± 15.41 [-14.42, 6.31]; 0.26; 0.4432; ---- | 1.21 ± 30.95 [-20.14, 22.56]; 0.04; 0.9115; ----  | 3.42 ± 17.48 [-8.81, 15.64]; 0.20; 0.5837; ----   |
|                             | M6: Treadmill desk - Control            | 19 | 14                                                                                                | -13.09 ± 15.97 [-24.01, -2.17]; 0.82; 0.0188; ⊗  | -16.68 ± 35.07 [-40.91, 7.56]; 0.48; 0.1775; ---- | -2.36 ± 19.00 [-15.68, 10.95]; 0.12; 0.7280; ---- |
|                             | M6: Treadmill desk - Sit-to-stand desk  | 19 | 20                                                                                                | -9.03 ± 17.24 [-19.88, 1.81]; 0.52; 0.1026; ---- | -17.89 ± 32.82 [-38.67, 2.90]; 0.54; 0.0917; ---- | -5.78 ± 16.70 [-16.30, 4.74]; 0.35; 0.2817; ----  |
|                             | M12: Sit-to-stand desk - Control        | 20 | 18                                                                                                | 1.22 ± 14.99 [-8.27, 10.71]; 0.08; 0.8009; ----  | 8.76 ± 29.13 [-9.61, 27.14]; 0.30; 0.3500; ----   | 5.88 ± 15.17 [-3.69, 15.46]; 0.39; 0.2284; ----   |
|                             | M12: Treadmill desk - Control           | 20 | 18                                                                                                | -15.00 ± 14.56 [-24.35, -5.65]; 1.03; 0.0017; ⊗  | -20.87 ± 27.59 [-38.57, -3.16]; 0.76; 0.0209; ⊗   | -3.30 ± 15.35 [-13.11, 6.50]; 0.22; 0.5091; ----  |
|                             | M12: Treadmill desk - Sit-to-stand desk | 20 | 20                                                                                                | -16.22 ± 13.94 [-24.87, -7.57]; 1.16; 0.0002; ⊗  | -29.63 ± 27.29 [-46.41, -12.84]; 1.09; 0.0005; ⊗  | -9.19 ± 15.16 [-18.57, 0.19]; 0.61; 0.0549; ----  |
| Within Group Comparisons    | Control: Δ B to M3                      | 21 | 15                                                                                                | -4.19 ± 15.90 [-13.18, 4.81]; 0.26; 0.3617; ---- | -6.25 ± 31.95 [-23.27, 10.76]; 0.20; 0.4713; ---- | -4.87 ± 18.27 [-14.81, 5.07]; 0.27; 0.3369; ----  |
|                             | Control: Δ B to M6                      | 21 | 14                                                                                                | 1.95 ± 15.55 [-6.97, 10.87]; 0.13; 0.6680; ----  | -0.04 ± 34.19 [-19.94, 19.87]; 0.00; 0.9972; ---- | -3.40 ± 19.67 [-15.10, 8.30]; 0.17; 0.5692; ----  |
|                             | Control: Δ B to M12                     | 21 | 18                                                                                                | -1.05 ± 16.29 [-10.02, 7.91]; 0.06; 0.8182; ---- | -4.82 ± 32.35 [-21.63, 11.99]; 0.15; 0.5741; ---- | -5.64 ± 17.64 [-14.72, 3.44]; 0.32; 0.2232; ----  |
|                             | Control: Δ M3 to M6                     | 15 | 14                                                                                                | 6.14 ± 14.36 [-2.95, 15.22]; 0.43; 0.1854; ----  | 6.22 ± 31.03 [-13.50, 25.94]; 0.20; 0.5366; ----  | 1.47 ± 18.29 [-10.33, 13.27]; 0.08; 0.8070; ----  |
|                             | Control: Δ M3 to M12                    | 15 | 18                                                                                                | 3.14 ± 15.15 [-5.88, 12.15]; 0.21; 0.4954; ----  | 1.43 ± 28.98 [-14.87, 17.73]; 0.05; 0.8632; ----  | -0.77 ± 16.08 [-9.91, 8.37]; 0.05; 0.8684; ----   |
|                             | Control: Δ M6 to M12                    | 14 | 18                                                                                                | -3.00 ± 14.79 [-11.90, 5.90]; 0.20; 0.5084; ---- | -4.78 ± 31.43 [-24.02, 14.45]; 0.15; 0.6259; ---- | -2.24 ± 17.66 [-13.28, 8.79]; 0.13; 0.6902; ----  |
|                             | Sit-to-stand desk: Δ B to M3            | 23 | 21                                                                                                | 2.66 ± 13.58 [-4.18, 9.49]; 0.20; 0.4464; ----   | 9.97 ± 25.90 [-2.38, 22.31]; 0.38; 0.1137; ----   | 7.76 ± 14.59 [0.74, 14.78]; 0.53; 0.0304; ⊗       |
|                             | Sit-to-stand desk: Δ B to M6            | 23 | 20                                                                                                | 4.10 ± 15.01 [-4.03, 12.24]; 0.27; 0.3229; ----  | 11.01 ± 26.56 [-2.22, 24.24]; 0.41; 0.1028; ----  | 5.33 ± 14.27 [-1.64, 12.30]; 0.37; 0.1340; ----   |
|                             | Sit-to-stand desk: Δ B to M12           | 23 | 20                                                                                                | 6.38 ± 13.75 [-0.80, 13.56]; 0.46; 0.0817; ----  | 13.78 ± 26.81 [0.19, 27.37]; 0.51; 0.0468; ⊗      | 5.55 ± 14.29 [-1.43, 12.54]; 0.39; 0.1193; ----   |
|                             | Sit-to-stand desk: Δ M3 to M6           | 21 | 20                                                                                                | 1.45 ± 15.45 [-7.06, 9.96]; 0.09; 0.7387; ----   | 1.05 ± 27.76 [-13.25, 15.35]; 0.04; 0.8858; ----  | -2.43 ± 15.25 [-10.24, 5.38]; 0.16; 0.5418; ----  |
|                             | Sit-to-stand desk: Δ M3 to M12          | 21 | 20                                                                                                | 3.72 ± 14.23 [-3.90, 11.34]; 0.26; 0.3383; ----  | 3.82 ± 28.00 [-10.81, 18.44]; 0.14; 0.6089; ----  | -2.21 ± 15.26 [-10.02, 5.60]; 0.14; 0.5797; ----  |
|                             | Sit-to-stand desk: Δ M6 to M12          | 20 | 20                                                                                                | 2.27 ± 15.59 [-6.46, 11.00]; 0.15; 0.6098; ----  | 2.77 ± 28.61 [-12.55, 18.09]; 0.10; 0.7232; ----  | 0.22 ± 14.96 [-7.53, 7.98]; 0.01; 0.9550; ----    |
|                             | Treadmill desk: Δ B to M3               | 22 | 22                                                                                                | -2.72 ± 14.69 [-9.97, 4.53]; 0.19; 0.4618; ----  | 1.35 ± 29.16 [-12.23, 14.92]; 0.05; 0.8460; ----  | 3.20 ± 15.59 [-3.86, 10.26]; 0.21; 0.3740; ----   |
|                             | Treadmill desk: Δ B to M6               | 22 | 19                                                                                                | -2.21 ± 15.73 [-10.67, 6.24]; 0.14; 0.6078; ---- | 2.54 ± 31.63 [-14.06, 19.14]; 0.08; 0.7640; ----  | 5.62 ± 16.26 [-2.60, 13.83]; 0.35; 0.1801; ----   |
|                             | Treadmill desk: Δ B to M12              | 22 | 20                                                                                                | -7.13 ± 13.44 [-13.70, -0.56]; 0.53; 0.0334; ⊗   | -6.43 ± 25.58 [-17.86, 5.00]; 0.25; 0.2703; ----  | 2.43 ± 14.67 [-4.30, 9.17]; 0.17; 0.4789; ----    |
| Treadmill desk: Δ M3 to M6  | 22                                      | 19 | 0.51 ± 16.83 [-8.62, 9.63]; 0.03; 0.9133; ----                                                    | 1.20 ± 34.63 [-17.13, 19.52]; 0.03; 0.8980; ---- | 2.41 ± 17.68 [-6.65, 11.48]; 0.14; 0.6016; ----   |                                                   |
| Treadmill desk: Δ M3 to M12 | 22                                      | 20 | -4.41 ± 14.72 [-11.85, 3.03]; 0.30; 0.2457; ----                                                  | -7.78 ± 29.22 [-21.70, 6.15]; 0.27; 0.2736; ---- | -0.77 ± 16.22 [-8.54, 7.00]; 0.05; 0.8460; ----   |                                                   |
| Treadmill desk: Δ M6 to M12 | 19                                      | 20 | -4.91 ± 15.76 [-13.54, 3.71]; 0.31; 0.2641; ----                                                  | -8.97 ± 31.68 [-25.87, 7.93]; 0.28; 0.2980; ---- | -3.18 ± 16.87 [-12.00, 5.64]; 0.19; 0.4794; ----  |                                                   |

Supplemental Table 5. Between and within group comparisons of the mean number of daily sedentary, standing and stepping bouts at the workplace, adjusted for age

Key: B= Baseline, M3= Month-3, M6= Month-6, M12= Month-12 follow-ups, N1= sample size of 1st comparison group, N2= sample size of 2nd comparison group
